# Supplementary material
Source: MDPI journal article supplement (https://www.mdpi.com/1424-2818/10/3/88)
Supplement: s1 [file s1]

Archive with 3 entries (3 files):
- Supplementary Materials 1.pdf
- Supplementary Materials 2.pdf
- Supplementary Materials 3.pdf
