# Supplementary material
Source: MDPI journal article supplement (https://www.mdpi.com/1424-2818/10/3/88)
Supplement: s1 [file s1 › Supplementary Materials 2.pdf]

## Supplementary Materials 2

GenBank accession numbers for sequences used in this study. All accession numbers are new to this study except for those indicated with a \* which were obtained from Fountain et al. 2015.

|                                       | COI       | ITS2      |
|---------------------------------------|-----------|-----------|
| <i>Lyperobius huttoni</i> 5           | MH537667  | MH536722  |
| <i>Lyperobius huttoni</i> 6           | MH537666  | MH536723  |
| <i>Lyperobius huttoni</i> 7           | MH537668  | MH536724  |
| <i>Lyperobius huttoni</i> 11          | MH537669  | MH536725  |
| <i>Lyperobius huttoni</i> 12          | MH537670  | MH536726  |
| <i>Lyperobius huttoni</i> 27          | MH537671  | MH536727  |
| <i>Karocolens pittospori</i> 1981     | MH537735  | -         |
| <i>Karocolens pittospori</i> 2009     | MH537734  | -         |
| <i>Hadramphus spinipennis</i> A       | KP664116* | KP664132* |
| <i>Hadramphus spinipennis</i> B       | KP664118* | KP664133* |
| <i>Hadramphus spinipennis</i> C       | MH537672  | KP664134* |
| <i>Hadramphus spinipennis</i> D       | KP664120* | KP664135* |
| <i>Hadramphus spinipennis</i> E       | MH537673  | KP664136* |
| <i>Hadramphus spinipennis</i> F       | MH537674  | KP664137* |
| <i>Hadramphus spinipennis</i> G       | KP664122* | KP664138* |
| <i>Hadramphus spinipennis</i> H       | KP664124* | KP664139* |
| <i>Hadramphus spinipennis</i> I       | MH537675  | KP664140* |
| <i>Hadramphus spinipennis</i> J       | KP664126* | KP664141* |
| <i>Hadramphus spinipennis</i> K       | MH537676  | -         |
| <i>Hadramphus spinipennis</i> L       | MH537677  | -         |
| <i>Hadramphus spinipennis</i> M       | MH536778  | KP664142* |
| <i>Hadramphus spinipennis</i> N       | KP664128* | KP664143* |
| <i>Hadramphus spinipennis</i> O       | KP664130* | KP664144* |
| <i>Hadramphus spinipennis</i> 1.1     | MH537679  | KP664145* |
| <i>Hadramphus spinipennis</i> 1.2     | KP664117* | KP664146* |
| <i>Hadramphus spinipennis</i> 1.3     | MH537680  | KP664147* |
| <i>Hadramphus spinipennis</i> 1.4     | KP664119* | KP664148* |
| <i>Hadramphus spinipennis</i> 2.1     | MH537681  | KP664149* |
| <i>Hadramphus spinipennis</i> 2.2     | KP664121* | KP664150* |
| <i>Hadramphus spinipennis</i> 3.1     | KP664123* | KP664151* |
| <i>Hadramphus spinipennis</i> 3.2     | MH537682  | -         |
| <i>Hadramphus spinipennis</i> 4.2     | MH537683  | KP664152* |
| <i>Hadramphus spinipennis</i> 4.3     | KP664127* | KP664153* |
| <i>Hadramphus spinipennis</i> 6.1     | KP664129* | KP664154* |
| <i>Hadramphus spinipennis</i> 6.2     | KP664131* | KP664155* |
| <i>Hadramphus spinipennis</i> 6.3     | MH537684  | KP664156* |
| <i>Hadramphus stilbocarpae</i> 1      | MH537685  | MH536680  |
| <i>Hadramphus stilbocarpae</i> 2      | MH537686  | MH536681  |
| <i>Hadramphus tuberculatus</i> 2_2007 | MH537687  | MH536682  |
| <i>Hadramphus tuberculatus</i> 3_2007 | MH537688  | MH536683  |
| <i>Hadramphus tuberculatus</i> 4_2007 | MH537689  | MH536684  |

|                                        |          |          |
|----------------------------------------|----------|----------|
| <i>Hadramphus tuberculatus</i> 6_2007  | MH537690 | MH536685 |
| <i>Hadramphus tuberculatus</i> 1_2009  | MH537691 | MH536686 |
| <i>Hadramphus tuberculatus</i> 3_2009  | MH537692 | MH536687 |
| <i>Hadramphus tuberculatus</i> 5_2009  | MH537693 | MH536688 |
| <i>Hadramphus tuberculatus</i> 6_2009  | MH537694 | -        |
| <i>Hadramphus tuberculatus</i> 7_2009  | MH537695 | -        |
| <i>Hadramphus tuberculatus</i> 8_2009  | MH537696 | MH536689 |
| <i>Hadramphus tuberculatus</i> 9_2009  | MH537697 | MH536690 |
| <i>Hadramphus tuberculatus</i> 12_2009 | MH537698 | MH536691 |
| <i>Hadramphus tuberculatus</i> 16_2009 | MH537699 | MH536692 |
| <i>Hadramphus tuberculatus</i> 18_2009 | MH537700 | MH536693 |
| <i>Hadramphus tuberculatus</i> 24_2009 | MH537701 | -        |
| <i>Hadramphus tuberculatus</i> 25_2009 | MH537702 | MH536694 |
| <i>Hadramphus tuberculatus</i> 27_2009 | MH537703 | MH536695 |
| <i>Hadramphus tuberculatus</i> 29_2009 | MH537704 | MH536696 |
| <i>Hadramphus tuberculatus</i> 35_2009 | MH537705 | MH536697 |
| <i>Hadramphus tuberculatus</i> 45_2009 | MH537706 | MH536698 |
| <i>Hadramphus tuberculatus</i> 46_2009 | MH537707 | MH536699 |
| <i>Hadramphus tuberculatus</i> 47_2009 | MH537708 | MH536700 |
| <i>Hadramphus tuberculatus</i> 48_2009 | MH537709 | -        |
| <i>Hadramphus tuberculatus</i> 1_2010  | MH537710 | MH536701 |
| <i>Hadramphus tuberculatus</i> 2_2010  | MH537711 | -        |
| <i>Hadramphus tuberculatus</i> 3_2010  | MH537712 | -        |
| <i>Hadramphus tuberculatus</i> 4_2010  | MH537713 | MH536702 |
| <i>Hadramphus tuberculatus</i> 5_2010  | -        | MH536703 |
| <i>Hadramphus tuberculatus</i> 6_2010  | MH537714 | MH536704 |
| <i>Hadramphus tuberculatus</i> 7_2010  | MH537715 | MH536705 |
| <i>Hadramphus tuberculatus</i> 8_2010  | MH537716 | -        |
| <i>Hadramphus tuberculatus</i> 10_2010 | MH537717 | MH536706 |
| <i>Hadramphus tuberculatus</i> 11_2010 | MH537718 | MH536707 |
| <i>Hadramphus tuberculatus</i> 13_2010 | MH537719 | MH536708 |
| <i>Hadramphus tuberculatus</i> 14_2010 | MH537720 | MH536709 |
| <i>Hadramphus tuberculatus</i> 15_2010 | MH537721 | MH536710 |
| <i>Hadramphus tuberculatus</i> 17_2010 | MH537722 | MH536711 |
| <i>Hadramphus tuberculatus</i> 18_2010 | MH537723 | MH536712 |
| <i>Hadramphus tuberculatus</i> 23_2010 | MH537724 | MH536713 |
| <i>Hadramphus tuberculatus</i> 24_2010 | MH537725 | MH536714 |
| <i>Hadramphus tuberculatus</i> 25_2010 | MH537726 | MH536715 |
| <i>Hadramphus tuberculatus</i> 29_2010 | MH537727 | MH536716 |
| <i>Hadramphus tuberculatus</i> 31_2010 | MH537728 | -        |
| <i>Hadramphus tuberculatus</i> 32_2010 | MH537729 | -        |
| <i>Hadramphus tuberculatus</i> 33_2010 | MH537730 | MH536717 |
| <i>Hadramphus tuberculatus</i> 35_2010 | MH537731 | -        |
| <i>Hadramphus tuberculatus</i> 37_2010 | -        | MH536718 |
| <i>Hadramphus tuberculatus</i> 38_2010 | -        | MH536719 |
| <i>Hadramphus tuberculatus</i> 40_2010 | MH537732 | MH536720 |

*Hadramphus tuberculatus* 41\_2010

MH537733

MH536721

---
