# Supplementary material
Source: MDPI journal article supplement (https://www.mdpi.com/1424-2818/10/3/88)
Supplement: s1 [file s1 › Supplementary Materials 3.pdf]

## Supplementary Materials 3

The morphological characteristics used in the StarBEAST2 analysis. The files are formatted as nexus files.

A. Craw

```
#NEXUS
```

```
begin taxa;
```

```
  TITLE weevil;
```

```
  dimensions ntax=72;
```

```
  taxlabels
```

```
    L_huttoni_5
```

```
    L_huttoni_6
```

```
    L_huttoni_7
```

```
    L_huttoni_11
```

```
    L_huttoni_12
```

```
    L_huttoni_27
```

```
    H_tuberculatus_2_2007
```

```
    H_tuberculatus_3_2007
```

```
    H_tuberculatus_4_2007
```

```
    H_tuberculatus_6_2007
```

```
    H_tuberculatus_1_2009
```

```
    H_tuberculatus_3_2009
```

```
    H_tuberculatus_5_2009
```

```
    H_tuberculatus_8_2009
```

```
    H_tuberculatus_9_2009
```

```
    H_tuberculatus_12_2009
```

```
    H_tuberculatus_16_2009
```

```
    H_tuberculatus_18_2009
```

```
    H_tuberculatus_25_2009
```

```
    H_tuberculatus_27_2009
```

```
    H_tuberculatus_29_2009
```

```
    H_tuberculatus_35_2009
```

```
    H_tuberculatus_45_2009
```

```
    H_tuberculatus_46_2009
```

```
    H_tuberculatus_47_2009
```

```
    H_tuberculatus_1_2010
```

```
    H_tuberculatus_4_2010
```

```
    H_tuberculatus_6_2010
```

```
    H_tuberculatus_7_2010
```

```
    H_tuberculatus_10_2010
```

```
    H_tuberculatus_11_2010
```

H\_tuberculatus\_13\_2010  
H\_tuberculatus\_14\_2010  
H\_tuberculatus\_15\_2010  
H\_tuberculatus\_17\_2010  
H\_tuberculatus\_18\_2010  
H\_tuberculatus\_23\_2010  
H\_tuberculatus\_25\_2010  
H\_tuberculatus\_29\_2010  
H\_tuberculatus\_32\_2010  
H\_tuberculatus\_33\_2010  
H\_tuberculatus\_40\_2010  
H\_tuberculatus\_41\_2010  
H\_stilbocarpae\_1  
H\_stilbocarpae\_2  
H\_spinipennis\_A  
H\_spinipennis\_B  
H\_spinipennis\_C  
H\_spinipennis\_D  
H\_spinipennis\_E  
H\_spinipennis\_F  
H\_spinipennis\_G  
H\_spinipennis\_H  
H\_spinipennis\_I  
H\_spinipennis\_J  
H\_spinipennis\_M  
H\_spinipennis\_N  
H\_spinipennis\_O  
H\_spinipennis\_1\_1  
H\_spinipennis\_1\_2  
H\_spinipennis\_1\_3  
H\_spinipennis\_1\_4  
H\_spinipennis\_2\_1  
H\_spinipennis\_2\_2  
H\_spinipennis\_3\_1  
H\_spinipennis\_4\_2  
H\_spinipennis\_4\_3  
H\_spinipennis\_6\_1  
H\_spinipennis\_6\_2  
H\_spinipennis\_6\_3  
H\_pittospori\_2009  
H\_pittospori\_1981

;  
end;

```

begin characters;
  TITLE crawl;
  LINK TAXA = weevil;
  dimensions nchar=13;
  format missing=? gap=- datatype=Standard SYMBOLS="012";
  CHARSTATE LABELS
    1      'Rostrum median carina' / present absent,
    2      'Postocular lobes' / present absent,
    3      'Pronatum lateral margins' / 0 1 2,
    4      'Pronatal disc' / punctate tubercles,
    5      'Metasternal margin' / fold tooth,
    6      'Mesepisternum' / 'no impression' 'distinct elongate impression',
    7      'Elytral scales' / scatter confined,
    8      'Elytral disc interval (3, 5, 7)' / 'flat to convex' tuberculate,
    9      'Mid-elytral declivity' / 'interval 3 flat to costate' 'tubercle on
interval 3',
    10     'Elytral declivity lateral margin' / 'without tubercle on interval 9'
'with tubercle on interval 9',
    11     'Femoral tooth' / present absent,
    12     'Male 5th ventrite' / 'not medio-apically emarginate' emarginate,
    13     'Female gonocoxites' / short long,
    ;

MATRIX
[          10      20 ]
[          .      . ]
L_huttoni_5          0000001000101
L_huttoni_6          0000001000101
L_huttoni_7          0000001000101
L_huttoni_11         0000001000101
L_huttoni_12         0000001000101
L_huttoni_27         0000001000101
H_tuberculatus_2_2007 0121110100100
H_tuberculatus_3_2007 0121110100100
H_tuberculatus_4_2007 0121110100100
H_tuberculatus_6_2007 0121110100100
H_tuberculatus_1_2009 0121110100100
H_tuberculatus_3_2009 0121110100100
H_tuberculatus_5_2009 0121110100100
H_tuberculatus_8_2009 0121110100100
H_tuberculatus_9_2009 0121110100100
H_tuberculatus_12_2009 0121110100100
H_tuberculatus_16_2009 0121110100100

```

|                        |               |
|------------------------|---------------|
| H_tuberculatus_18_2009 | 0121110100100 |
| H_tuberculatus_25_2009 | 0121110100100 |
| H_tuberculatus_27_2009 | 0121110100100 |
| H_tuberculatus_29_2009 | 0121110100100 |
| H_tuberculatus_35_2009 | 0121110100100 |
| H_tuberculatus_45_2009 | 0121110100100 |
| H_tuberculatus_46_2009 | 0121110100100 |
| H_tuberculatus_47_2009 | 0121110100100 |
| H_tuberculatus_1_2010  | 0121110100100 |
| H_tuberculatus_4_2010  | 0121110100100 |
| H_tuberculatus_6_2010  | 0121110100100 |
| H_tuberculatus_7_2010  | 0121110100100 |
| H_tuberculatus_10_2010 | 0121110100100 |
| H_tuberculatus_11_2010 | 0121110100100 |
| H_tuberculatus_13_2010 | 0121110100100 |
| H_tuberculatus_14_2010 | 0121110100100 |
| H_tuberculatus_15_2010 | 0121110100100 |
| H_tuberculatus_17_2010 | 0121110100100 |
| H_tuberculatus_18_2010 | 0121110100100 |
| H_tuberculatus_23_2010 | 0121110100100 |
| H_tuberculatus_25_2010 | 0121110100100 |
| H_tuberculatus_29_2010 | 0121110100100 |
| H_tuberculatus_32_2010 | 0121110100100 |
| H_tuberculatus_33_2010 | 0121110100100 |
| H_tuberculatus_40_2010 | 0121110100100 |
| H_tuberculatus_41_2010 | 0121110100100 |
| H_stilbocarpae_1       | 1121110111111 |
| H_stilbocarpae_2       | 1121110111111 |
| H_spinipennis_A        | 1121110111011 |
| H_spinipennis_B        | 1121110111011 |
| H_spinipennis_C        | 1121110111011 |
| H_spinipennis_D        | 1121110111011 |
| H_spinipennis_E        | 1121110111011 |
| H_spinipennis_F        | 1121110111011 |
| H_spinipennis_G        | 1121110111011 |
| H_spinipennis_H        | 1121110111011 |
| H_spinipennis_I        | 1121110111011 |
| H_spinipennis_J        | 1121110111011 |
| H_spinipennis_M        | 1121110111011 |
| H_spinipennis_N        | 1121110111011 |
| H_spinipennis_O        | 1121110111011 |
| H_spinipennis_1_1      | 1121110111011 |
| H_spinipennis_1_2      | 1121110111011 |

|                   |               |
|-------------------|---------------|
| H_spinipennis_1_3 | 1121110111011 |
| H_spinipennis_1_4 | 1121110111011 |
| H_spinipennis_2_1 | 1121110111011 |
| H_spinipennis_2_2 | 1121110111011 |
| H_spinipennis_3_1 | 1121110111011 |
| H_spinipennis_4_2 | 1121110111011 |
| H_spinipennis_4_3 | 1121110111011 |
| H_spinipennis_6_1 | 1121110111011 |
| H_spinipennis_6_2 | 1121110111011 |
| H_spinipennis_6_3 | 1121110111011 |
| H_pittospori_2009 | 0111110101001 |
| H_pittospori_1981 | 0111110101001 |
| ;                 |               |
| END;              |               |

B. Kuschel

#NEXUS

begin taxa;

    TITLE weevil;

        dimensions ntax=72;

taxlabels

    L\_huttoni\_5

    L\_huttoni\_6

    L\_huttoni\_7

    L\_huttoni\_11

    L\_huttoni\_12

    L\_huttoni\_27

    H\_tuberculatus\_2\_2007

    H\_tuberculatus\_3\_2007

    H\_tuberculatus\_4\_2007

    H\_tuberculatus\_6\_2007

    H\_tuberculatus\_1\_2009

    H\_tuberculatus\_3\_2009

    H\_tuberculatus\_5\_2009

    H\_tuberculatus\_8\_2009

    H\_tuberculatus\_9\_2009

    H\_tuberculatus\_12\_2009

    H\_tuberculatus\_16\_2009

    H\_tuberculatus\_18\_2009

    H\_tuberculatus\_25\_2009

    H\_tuberculatus\_27\_2009

    H\_tuberculatus\_29\_2009

    H\_tuberculatus\_35\_2009

H\_tuberculatus\_45\_2009  
H\_tuberculatus\_46\_2009  
H\_tuberculatus\_47\_2009  
H\_tuberculatus\_1\_2010  
H\_tuberculatus\_4\_2010  
H\_tuberculatus\_6\_2010  
H\_tuberculatus\_7\_2010  
H\_tuberculatus\_10\_2010  
H\_tuberculatus\_11\_2010  
H\_tuberculatus\_13\_2010  
H\_tuberculatus\_14\_2010  
H\_tuberculatus\_15\_2010  
H\_tuberculatus\_17\_2010  
H\_tuberculatus\_18\_2010  
H\_tuberculatus\_23\_2010  
H\_tuberculatus\_25\_2010  
H\_tuberculatus\_29\_2010  
H\_tuberculatus\_32\_2010  
H\_tuberculatus\_33\_2010  
H\_tuberculatus\_40\_2010  
H\_tuberculatus\_41\_2010  
H\_stilbocarpe\_1  
H\_stilbocarpe\_2  
H\_spinipennis\_A  
H\_spinipennis\_B  
H\_spinipennis\_C  
H\_spinipennis\_D  
H\_spinipennis\_E  
H\_spinipennis\_F  
H\_spinipennis\_G  
H\_spinipennis\_H  
H\_spinipennis\_I  
H\_spinipennis\_J  
H\_spinipennis\_M  
H\_spinipennis\_N  
H\_spinipennis\_O  
H\_spinipennis\_1\_1  
H\_spinipennis\_1\_2  
H\_spinipennis\_1\_3  
H\_spinipennis\_1\_4  
H\_spinipennis\_2\_1  
H\_spinipennis\_2\_2  
H\_spinipennis\_3\_1  
H\_spinipennis\_4\_2  
H\_spinipennis\_4\_3  
H\_spinipennis\_6\_1

```

H_spinipennis_6_2
H_spinipennis_6_3
H_pittospori_2009
H_pittospori_1981
;
end;
begin characters;
  TITLE kuschel;
  LINK TAXA = weevil;
  dimensions nchar=12;
  format missing=? gap=- datatype=Standard SYMBOLS="012";
  CHARSTATE LABELS
    1      'Prothorax aand elytra' / 'no tubercles' tubercles,
    2      'Ocular lobes' / 'weakly developed' 'strongly developed',
    3      'Metasternum' / 'without projecting tooth' 'with projecting tooth',
    4      'Prothorax' / 'wider than long' 'as long as wide',
    5      'Elytra' / 'rounded on side, widest near middle, no distinct humeral
tubercle' 'straight sides from base to middle, distinct humeral tubercle'
    6      '2nd segment funicle' / short long,
    7      'host plant' / Apiaceae Aralieceae Pittosporaceae,
    8      'female tergal pouches' / absent present,
    9      'male tegminal ring' / 'without teeth, parameres narrow' 'teeth on
anterior edge, parameres broad',
    10     'symbiotic pouches containing filamentous prokaryots' / absent
present,
    11     'endophallus apex inverted Ushape' / no yes,
    12     'elytra interval 3 declivity and interval 9' / 'no tubercle on interval 3
in declivity and no tubercle on interval 9' 'tubercle on interval 3 declivity and tubercle on interval
9',
    ;

MATRIX
[
      10      20 ]
[
      .      . ]
L_huttoni_5      000--10-000-
L_huttoni_6      000--10-000-
L_huttoni_7      000--10-000-
L_huttoni_11     000--10-000-
L_huttoni_12     000--10-000-
L_huttoni_27     000--10-000-
H_tuberculatus_2_2007 111000000010
H_tuberculatus_3_2007 111000000010
H_tuberculatus_4_2007 111000000010
H_tuberculatus_6_2007 111000000010
H_tuberculatus_1_2009 111000000010
H_tuberculatus_3_2009 111000000010

```

|                        |              |
|------------------------|--------------|
| H_tuberculatus_5_2009  | 111000000010 |
| H_tuberculatus_8_2009  | 111000000010 |
| H_tuberculatus_9_2009  | 111000000010 |
| H_tuberculatus_12_2009 | 111000000010 |
| H_tuberculatus_16_2009 | 111000000010 |
| H_tuberculatus_18_2009 | 111000000010 |
| H_tuberculatus_25_2009 | 111000000010 |
| H_tuberculatus_27_2009 | 111000000010 |
| H_tuberculatus_29_2009 | 111000000010 |
| H_tuberculatus_35_2009 | 111000000010 |
| H_tuberculatus_45_2009 | 111000000010 |
| H_tuberculatus_46_2009 | 111000000010 |
| H_tuberculatus_47_2009 | 111000000010 |
| H_tuberculatus_1_2010  | 111000000010 |
| H_tuberculatus_4_2010  | 111000000010 |
| H_tuberculatus_6_2010  | 111000000010 |
| H_tuberculatus_7_2010  | 111000000010 |
| H_tuberculatus_10_2010 | 111000000010 |
| H_tuberculatus_11_2010 | 111000000010 |
| H_tuberculatus_13_2010 | 111000000010 |
| H_tuberculatus_14_2010 | 111000000010 |
| H_tuberculatus_15_2010 | 111000000010 |
| H_tuberculatus_17_2010 | 111000000010 |
| H_tuberculatus_18_2010 | 111000000010 |
| H_tuberculatus_23_2010 | 111000000010 |
| H_tuberculatus_25_2010 | 111000000010 |
| H_tuberculatus_29_2010 | 111000000010 |
| H_tuberculatus_32_2010 | 111000000010 |
| H_tuberculatus_33_2010 | 111000000010 |
| H_tuberculatus_40_2010 | 111000000010 |
| H_tuberculatus_41_2010 | 111000000010 |
| H_stilbocarpae_1       | 111000001011 |
| H_stilbocarpae_2       | 111000001011 |
| H_spinipennis_A        | 111000000011 |
| H_spinipennis_B        | 111000000011 |
| H_spinipennis_C        | 111000000011 |
| H_spinipennis_D        | 111000000011 |
| H_spinipennis_E        | 111000000011 |
| H_spinipennis_F        | 111000000011 |
| H_spinipennis_G        | 111000000011 |
| H_spinipennis_H        | 111000000011 |
| H_spinipennis_I        | 111000000011 |
| H_spinipennis_J        | 111000000011 |
| H_spinipennis_M        | 111000000011 |
| H_spinipennis_N        | 111000000011 |
| H_spinipennis_O        | 111000000011 |

|                   |              |
|-------------------|--------------|
| H_spinipennis_1_1 | 111000000011 |
| H_spinipennis_1_2 | 111000000011 |
| H_spinipennis_1_3 | 111000000011 |
| H_spinipennis_1_4 | 111000000011 |
| H_spinipennis_2_1 | 111000000011 |
| H_spinipennis_2_2 | 111000000011 |
| H_spinipennis_3_1 | 111000000011 |
| H_spinipennis_4_2 | 111000000011 |
| H_spinipennis_4_3 | 111000000011 |
| H_spinipennis_6_1 | 111000000011 |
| H_spinipennis_6_2 | 111000000011 |
| H_spinipennis_6_3 | 111000000011 |
| H_pittospori_2009 | 11111111210- |
| H_pittospori_1981 | 11111111210- |
| ;                 |              |
| END;              |              |
